# Supplementary material for: Aqueous supercapacitors of high energy density based on MoO3 nanoplates as anode material
Source: Royal Society of Chemistry journal article supplement (doi:10.1039/c1cc13474d), 2011-01-01
Supplement: c1cc13474d.pdf [file c1cc13474d.pdf]

Supporting information:

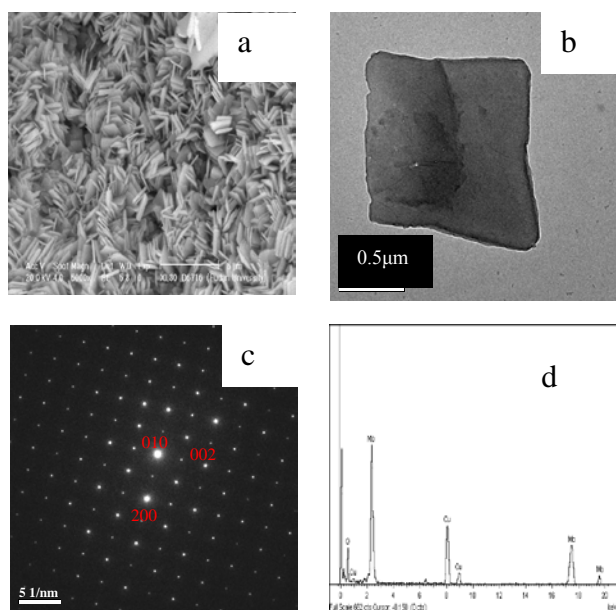

Fig.S1 (a) SEM micrograph in lower magnification, (b) TEM micrograph, (c) SAED pattern and (d) EDX pattern of  $\alpha$ - $\text{MoO}_3$  nanoplate.

X-ray diffraction pattern shows that the  $\alpha$ - $\text{MoO}_3$  nanoplates exist in  $\alpha$ -phase with lattice constants  $a = 3.9616 \text{ \AA}$ ,  $b = 13.8560 \text{ \AA}$ ,  $c = 3.6978 \text{ \AA}$ . Furthermore, from Fig.S1c, it can be seen that the  $\alpha$ - $\text{MoO}_3$  nanoplates consist of single crystal, which grows along [001] planes, which is mostly consistent with the report in reference [15]. Fig.S1d clearly shows that the nanoplates consist of Mo and O, and the composition is about  $\text{MoO}_3$ .

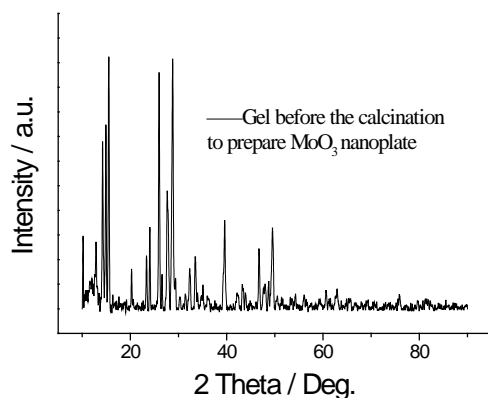

Fig.S2 XRD pattern of the gel before the calcination process to prepare  $\text{MoO}_3$  nanoplate.

There are some obvious differences between XRD patterns of the gel before the calcination process and the final  $\text{MoO}_3$  nanoplates as shown in Fig. 1(c). It suggests that the calcination process plays an important role in the crystal growth of  $\text{MoO}_3$  nanoplates.

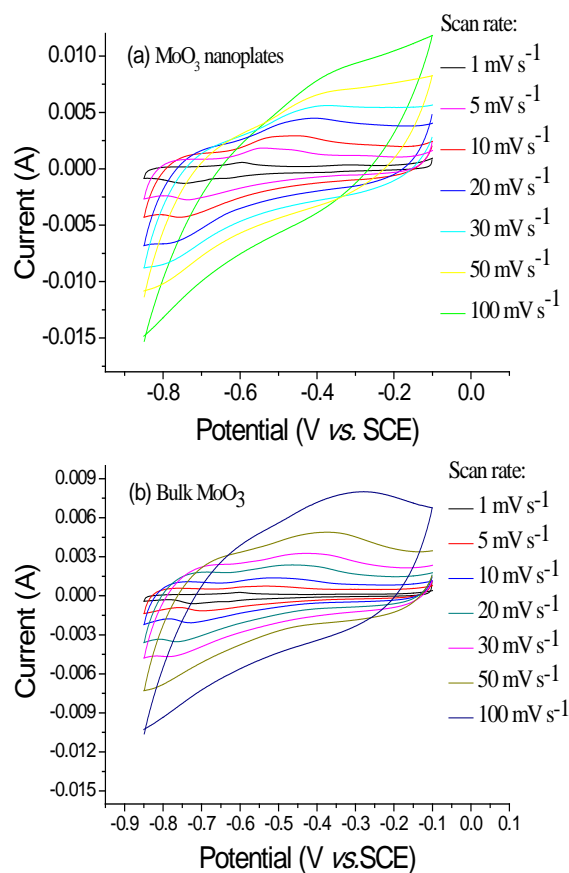

Fig.S3 CV curves of (a) the  $\text{MoO}_3$  nanoplates and (b) the bulk  $\text{MoO}_3$  at different scan rates in  $0.5 \text{ M Li}_2\text{SO}_4$  aqueous solution using nickel grid as the counter electrode and SCE as the reference electrode.

At low or high scan rate, the intergrated area of the CV curve for the  $\text{MoO}_3$  nanoplates is larger than that for the bulk  $\text{MoO}_3$ , indicating larger capacitance for the  $\text{MoO}_3$  nanoplates, which is consistent with the data in Fig.3.
